# Supplementary material
Source: PubMed Central journal article supplement (PMC5686606)
Supplement: JB.00168-17_zjb999094587s1.pdf [file JB.00168-17_zjb999094587s1.pdf]

# 1 SUPPORTING TABLE

## 2 Table S1. Primers used in this study.

| Primers | Direction | Characteristic(s)                                                                                                            | Sequence 5' → 3'                          |
|---------|-----------|------------------------------------------------------------------------------------------------------------------------------|-------------------------------------------|
| CMD96   | Forward   | Amplification of the <i>vat</i> gene<br>(used with CMD97)                                                                    | AACGGTTGGTGGCAACAATCC                     |
| CMD97   | Reverse   |                                                                                                                              | AGCCCTGTAGAATGGCGAGTA                     |
| CMD1070 | Reverse   | Contains a XmaI restriction site;<br>Amplification of the <i>glmS-pstA</i><br>region (used with CMD1072)                     | TCGCCCGGGATGCACTTCGCGAATCAG<br>GCTTAC     |
| CMD1072 | Forward   |                                                                                                                              | CACCAATCTTCTACACCGTTCCGC                  |
| CMD1099 | Forward   | Contains a XbaI restriction site;<br>Amplification of <i>yaiC</i> (used with<br>CMD1100)                                     | ATA TCT AGA ACG GGT GAG CTA<br>CGA AAA TG |
| CMD1100 | Reverse   | Contains a HindIII restriction site                                                                                          | TGC AAG CTT TCA GGC CGC CAC               |
| CMD1111 | Forward   | Amplification of the <i>phoA-psiF</i><br>region (used with CMD1112) or<br>the <i>phoA-yaiC</i> region (used with<br>CMD1114) | GCGCTAAATACCAAAGATGGCGCA                  |
| CMD1112 | Reverse   |                                                                                                                              | ACAGGAGGTCATACGCTGTTGTTG                  |
| CMD1113 | Forward   | Amplification of the <i>psiF-yaiC</i><br>region (used with CMD1114)                                                          | TTGCCTGAAGAACAGCAAGTCTGC                  |
| CMD1114 | Reverse   |                                                                                                                              | GAAACCAGCGTTGAAGCAATCGGT                  |
| CMD1156 | Forward   | Contains a XhoI restriction site;<br>Amplification of <i>yaiC</i> and its<br>promoter (used with CMD1157)                    | AAAGCCCTCGAGTACCTGATAGTGCTAA<br>CGGGTGAG  |
| CMD1157 | Reverse   | Contains a XmaI restriction site                                                                                             | TTCCGTCCCGGGGTGATCGAAGCGATG<br>ACGAAGTGT  |
| CMD1245 | Reverse   | Amplification of <i>phoA</i> and its<br>upstream promoter (Pho box)<br>(used with CMD1335)                                   | AGCCATTTTCGTAGCTCACC                      |
| CMD1336 | Forward   |                                                                                                                              | GATACGGAGCTGCTGCGCGATTAC                  |

|         |                          |                                                                                                                                                    |                                                                               |
|---------|--------------------------|----------------------------------------------------------------------------------------------------------------------------------------------------|-------------------------------------------------------------------------------|
| CMD1334 | Reverse                  | Used with primer CMD1335 to introduce point mutations in the promoter of <i>phoA</i> (Pho box)                                                     | § CTT <u>CGCAGACTGACCT</u> AAAAAGATTAA<br>CTTTTTACTGACGA                      |
| CMD1335 | Forward                  |                                                                                                                                                    | § <u>TAGGTCAGTCTGCG</u> AAGTTGTCACGG<br>CCGAGACTTATAGTC                       |
| CMD1246 | Forward                  | Amplification of ON-orientation of <i>fimS</i> (used with CMD1248)                                                                                 | ACCGTAACGCAGACTCATCCTCAT                                                      |
| CMD1247 | Reverse                  | Amplification of OFF-orientation of <i>fimS</i> (used with CMD1248)                                                                                | TGAACGGTCCCACCATTAACCG                                                        |
| CMD1248 | Forward<br>or<br>Reverse | Primer binds to <i>fimS</i> . Alternates between forward and reverse according to the orientation of <i>fimS</i> (used with CMD1247 and CMD1248)   | TCACATCACCTCCGCTATATGT                                                        |
| CMD1260 | Reverse                  | Contains a XmaI restriction site; Amplification of the <i>phoA-psiF-yaiC</i> region with the promoter of <i>phoA</i> (Pho box) (used with CMD1261) | CAGCCCGGGTCGAAGCGATGACGAAGT<br>GT                                             |
| CMD1261 | Forward                  |                                                                                                                                                    | GGA <sup>CT</sup> CGAGGCTGCTGCGGATTACGT<br>AA                                 |
| CMD1461 | Forward                  | Contains a BspHI restriction site; Amplification of <i>ydaM</i> (used with CMD1462)                                                                | TATCTGATTCATGACGTGGCTTTTTTGGC<br>ATCGG                                        |
| CMD1462 | Reverse                  | Contains a PstI restriction site                                                                                                                   | GACGCATCCTGCAGTTATGCCGCCAGCA<br>CGCGGTTGCG                                    |
| CMD1463 | Forward                  | Contains a BspHI restriction site; Amplification of <i>yjhH</i> (used with CMD1464)                                                                | CAGGACATTCATGATGATAAGGCAGGTT<br>ATCCAGC                                       |
| CMD1464 | Reverse                  | Contains a PstI restriction site                                                                                                                   | GAAAATGACTGCAGTTATAGCGCCAGAA<br>CCGCCGTATT                                    |
| CMD1508 | Forward                  | Used with CMD 1509 to generate a knockout of <i>ipuA</i>                                                                                           | CATGGTCTGCGTGTTAGTGAGCTTTAT<br>CTCTGCAGTTGTCGGATTTAGACATATG<br>AATATCCTCCTTAG |
| CMD1509 | Reverse                  | Used with CMD 1508 to generate a knockout of <i>ipuA</i>                                                                                           | GCGTCACCTATCCCCACATTTTTTCAA<br>TCTCATTGAATTAGAAGCAGTGTGTAGG<br>CTGGAGCTGCTTC  |

|         |         |                                                          |                                                                                |
|---------|---------|----------------------------------------------------------|--------------------------------------------------------------------------------|
| CMD1510 | Forward | Used with CMD 1511 to generate a knockout of <i>ipbA</i> | GAGATTACATCGATAACGTTCTGATTGCA<br>GGCATACTTATCTGGGTGTGCGTGTAGG<br>CTGGAGCTGCTTC |
| CMD1511 | Reverse | Used with CMD 1510 to generate a knockout of <i>ipbA</i> | CCACACCCCTTTAAAACGAGCAGCATT<br>CTGGCTGTGTATCTGACAGTATCATATG<br>AATATCCTCCTTAG  |

3 <sup>s</sup> Underlined nucleotides in red were altered from the original sequence to introduce point mutations into  
4 the promoter of *phoA* (Pho box).

5

6

7
